# Supplementary figures and images for: Efficacy and Safety of Pembrolizumab in Previously Treated Advanced Neuroendocrine Tumors: Results From the Phase II KEYNOTE-158 Study
Source: Oxford University Press journal article supplement (doi:10.1158/1078-0432.ccr-19-3014), 2020-01-24

**Figure S1.** Participant Enrollment and Treatment Disposition


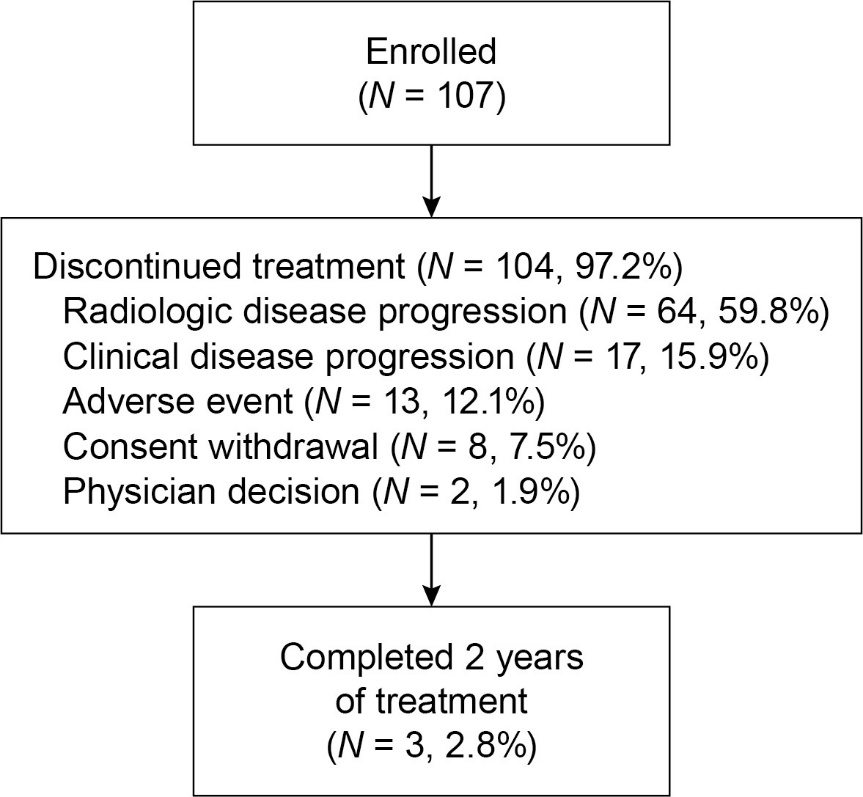

Supplement: 10780432ccr193014-sup-228994_2_supp_6009093_q3sll8.docx [file 10780432ccr193014-sup-228994_2_supp_6009093_q3sll8.docx]
